# Supplementary material for: Design of organically functionalised hybrid silica fibres through the use of anthracenic organogelatorsElectronic supplementary information (ESI) available: SEM images of other non-calcined/unwashed hybrid samples prepared using DDOA (non-hydrolytic conditions) and DAP organogelators (Fig. S1); additional SEM images of calcined/washed organosilicas (Fig. S2); 29Si MAS NMR spectra of samples A and B (Fig. S3). See http://www.rsc.org/suppdata/jm/b2/b212465n/
Source: Royal Society of Chemistry journal article supplement (doi:10.1039/b212465n), 2003-01-15
Supplement: b212465n.doc [file b212465n.doc]

# SUPPLEMENTARY INFORMATION

| 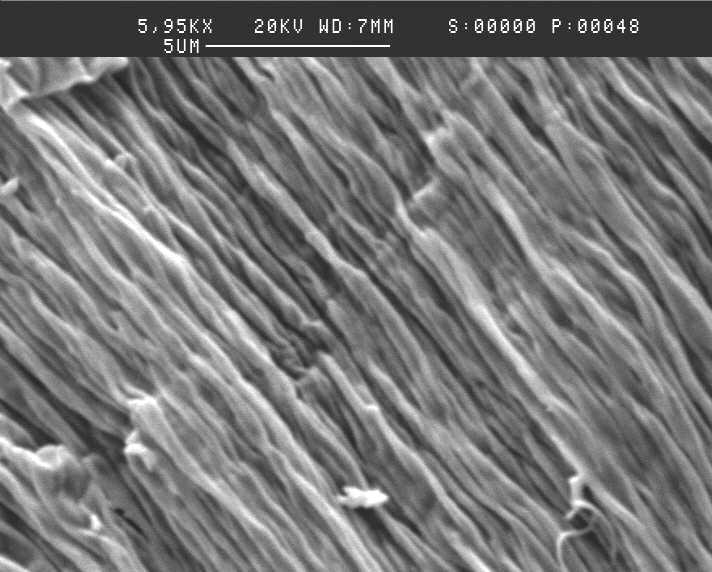  **a)** | 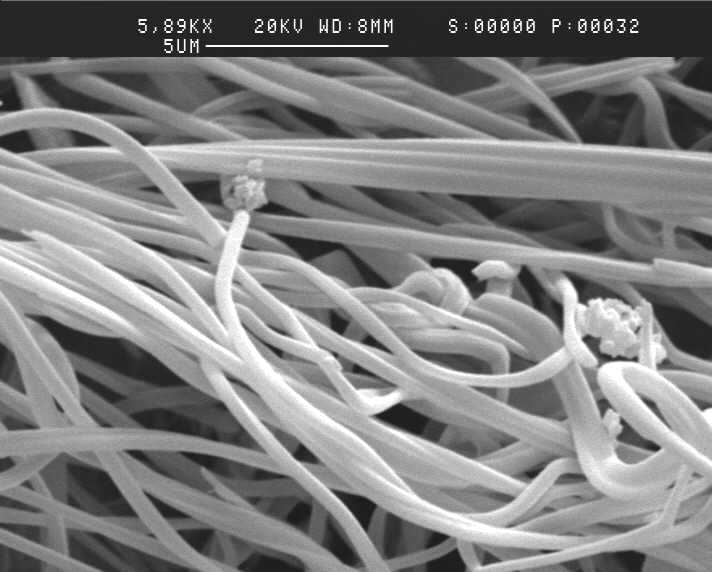  **b)** |
| --- | --- |
| **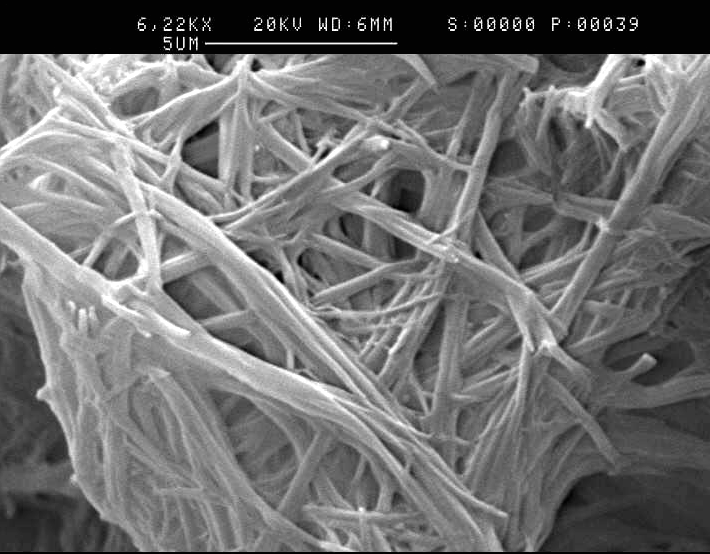**  **c)** | **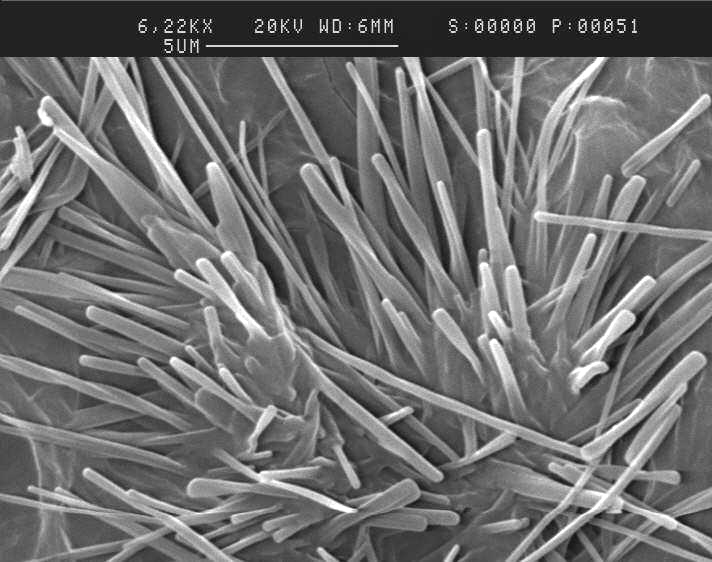**  **d)** |

**Fig. S1.** SEM micrographs corresponding to non-calcined/unwashed hybrid samples prepared using *DDOA* (a and b) or *DAP* (c and d) as organogelators, and with phenyl (a and c) or aminopropyl (b and d) groups as grafted organic moieties. The molar ratios employed in the hot solutions before gelation were: a) 0.8TEOS/0.2PTES/8EtOH/3HCOOH/8x10-3DDOA, b) 0.9TEOS/0.1APTES/8EtOH/3CF3COOH/
9x10-3DDOA, c) 0.8TEOS/0.2PTES/14acetonitrile/2H2O/2x10-2CF3COOH/2x10-2DAP, and d) 0.8TEOS/0.2APTES/14acetonitrile/2H2O/0.2HCl/2x10-2CF3COOH/2x10-2DAP.

***SUPPLEMENTARY INFORMATION***

| 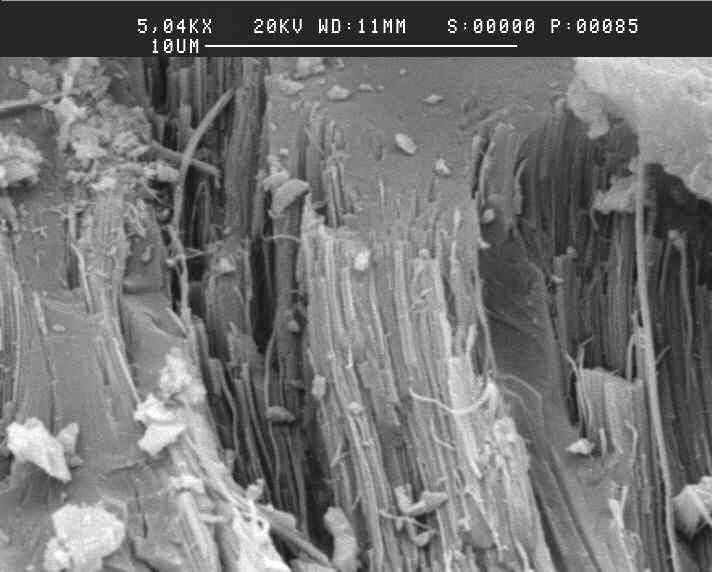  **a)** | **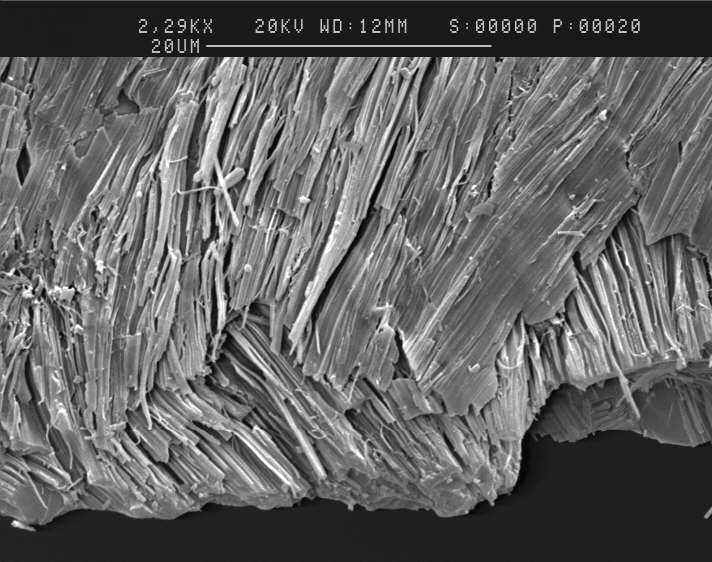**  **b)** |
| --- | --- |
| **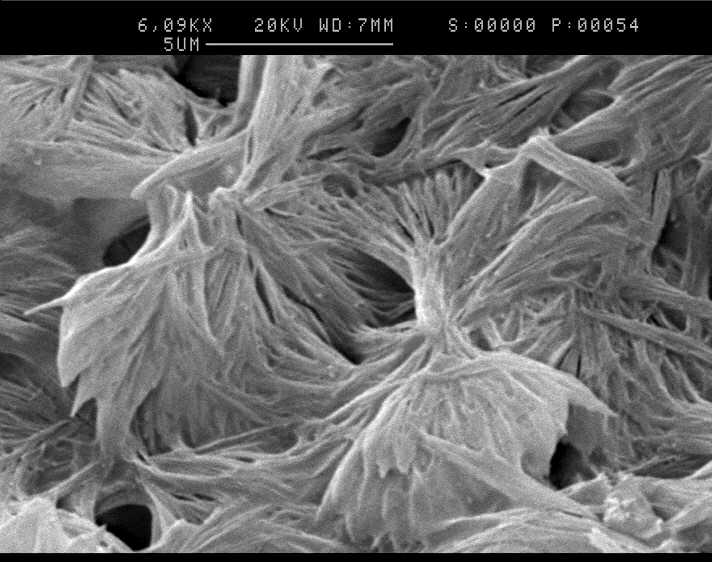**  **c)** | **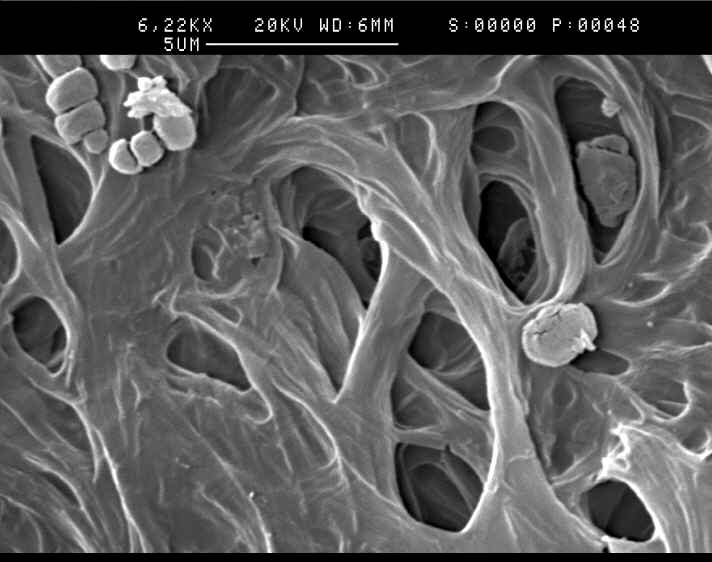**  **d)** |

**Fig. S2.** SEM micrographs corresponding to 350ºC-calcined (a) or washed (b to d) hybrid samples prepared using *DDOA* (a and b) or *DAP* (c and d) as organogelators, and with phenyl (a and c) or aminopropyl (b and d) groups as grafted organic moieties. The molar ratios employed in the hot solutions before gelation were: a) 0.8TEOS/0.2PTES/8EtOH/3HCOOH/8x10-3DDOA, b) 0.8TEOS/0.2APTES/
8EtOH/2H2O/0.2HCl/7.5x10-3DDOA (**sample B**), c) 0.8TEOS/0.2PTES/14acetonitrile/2H2O/2x10-2CF3COOH/2x10-2DAP, and d) 0.8TEOS/0.2APTES/14acetonitrile/2H2O/0.2HCl/2x10-2CF3COOH/
2x10-2DAP.

# SUPPLEMENTARY INFORMATION

|  |
| --- |

**Fig. S3.** 29SisolidNMR spectra of samples **A** (0.8TEOS-0.2 PTES) and **B** (0.8 TEOS-0.2 APTES) after calcination at 350ºC (**A**) or after Soxhlet washing + drying at 100ºC/3h (**B**). Chemical shifts (ppm) for sample **A**: Q4 (-109), Q3 (-100), T3 (-76), and T2 (-65); chemical shifts (ppm) for sample **B**: Q4 (-110), Q3 (-101), Q2 (-92), T3 (-67), and T2 (-58).
